# Supplementary material for: MetaLonDA: a flexible R package for identifying time intervals of differentially abundant features in metagenomic longitudinal studies
Source: PubMed Central journal article supplement (PMC5812052; doi:10.1186/s40168-018-0402-y), 2018-02-13
Supplement: 40168_2018_402_MOESM4_ESM.pdf [file 40168_2018_402_MOESM4_ESM.pdf]

**Table S1:** Number and percentage of genera out of 128 genera that do not show significant differences ( $p\text{-value}>0.05$ ) with various standard statistical parametric distributions. The count data is taken from DIABIMMUNE study.

|                    | #   | %    |
|--------------------|-----|------|
| <b>NB</b>          | 101 | 78.9 |
| <b>ZIP</b>         | 46  | 35.9 |
| <b>Poisson</b>     | 63  | 49.2 |
| <b>Log-normal</b>  | 0   | 0    |
| <b>Exponential</b> | 0   | 0    |
| <b>Half-normal</b> | 0   | 0    |
| <b>Normal</b>      | 0   | 0    |
