# Supplementary material for: MetaLonDA: a flexible R package for identifying time intervals of differentially abundant features in metagenomic longitudinal studies
Source: PubMed Central journal article supplement (PMC5812052; doi:10.1186/s40168-018-0402-y), 2018-02-13

Dominant | FIN | RUS

Method | MetaLonDA

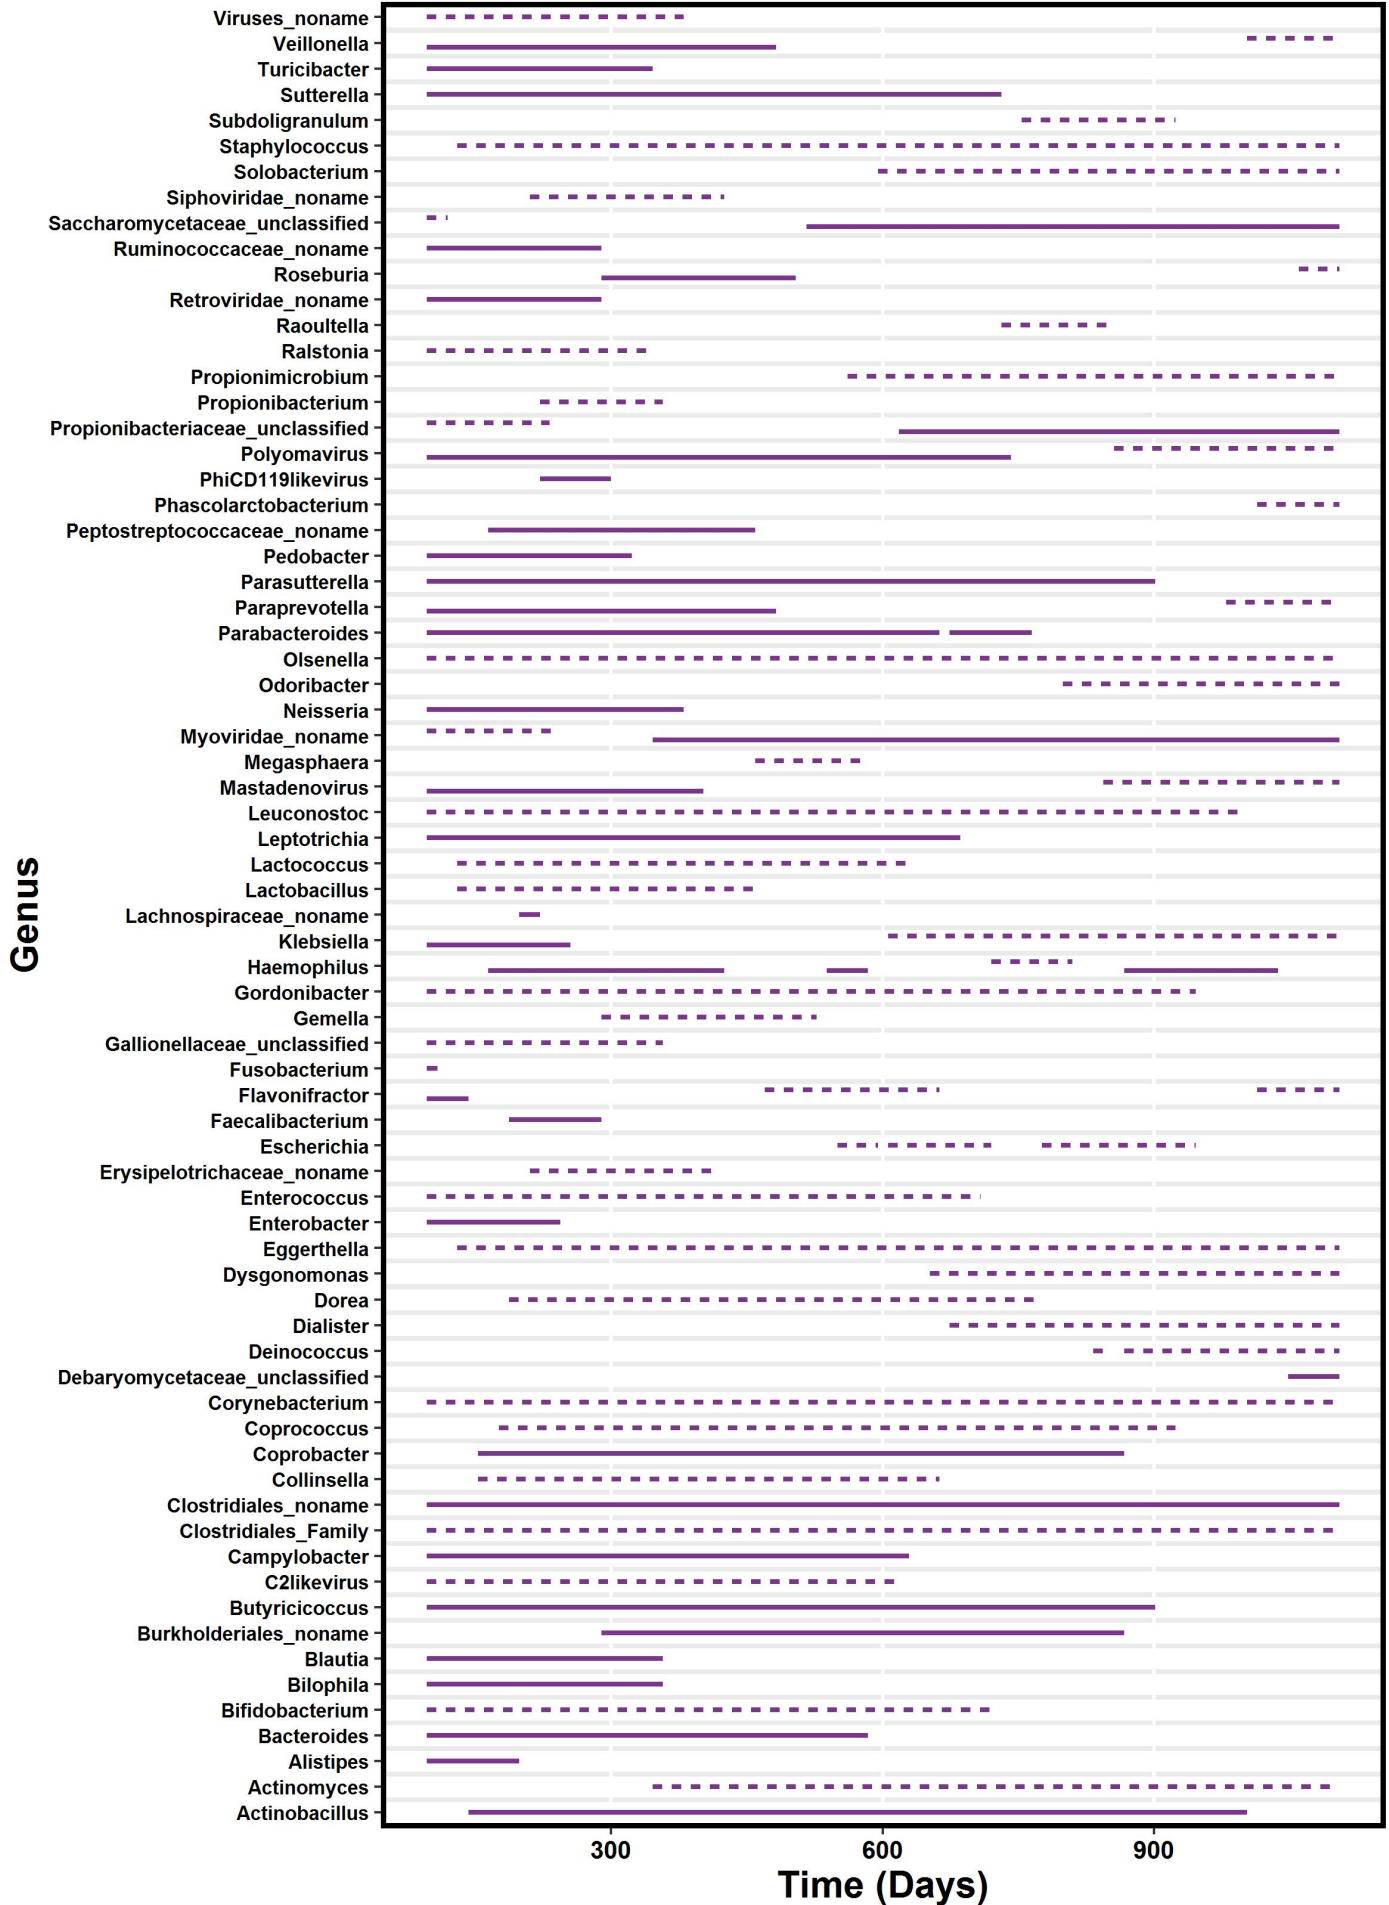

Supplement: 40168_2018_402_MOESM7_ESM.pdf [file 40168_2018_402_MOESM7_ESM.pdf]
